# Supplementary material for: Psychometrische Eigenschaften der deutschsprachigen Version des Interpersonal Emotion Regulation Questionnaire
Source: Atypon-hosted journal article supplement (doi:10.1026/0012-1924/a000239), 2019-12-19
Supplement: 0012-1924_a000239_esm1.pdf [file 0012-1924_a000239_esm1.pdf]

## IERQ

Im Folgenden finden Sie eine Liste mit Aussagen, die beschreiben, wie Menschen **mit Hilfe anderer** mit ihren Gefühlen umgehen. Bitte lesen Sie jede Aussage durch und markieren Sie im Feld daneben die Zahl, die angibt, inwieweit diese Aussage auf Sie zutrifft. Verwenden Sie dabei bitte eine Skala von 1 (trifft *keinesfalls* auf mich zu) bis 5 (trifft *vollkommen* auf mich zu).

Bitte bearbeiten Sie jede Aussage. Es gibt keine richtigen oder falschen Antworten.

|     |                                                                                                                                                     | trifft keinesfalls auf mich zu | trifft ein wenig auf mich zu | trifft einigermaßen auf mich zu | trifft ziemlich auf mich zu | trifft vollkommen auf mich zu |
|-----|-----------------------------------------------------------------------------------------------------------------------------------------------------|--------------------------------|------------------------------|---------------------------------|-----------------------------|-------------------------------|
| 1.  | Ich fühle mich besser, wenn ich erfahre, wie andere mit ihren Gefühlen umgegangen sind.                                                             | ①                              | ②                            | ③                               | ④                           | ⑤                             |
| 2.  | Es hilft mir, mit niedergeschlagener Stimmung umzugehen, wenn andere mich darauf hinweisen, dass die Dinge nicht so schlimm sind, wie sie scheinen. | ①                              | ②                            | ③                               | ④                           | ⑤                             |
| 3.  | Ich bin gerne von anderen umgeben, wenn ich begeistert bin, um meine Gefühle zu teilen.                                                             | ①                              | ②                            | ③                               | ④                           | ⑤                             |
| 4.  | Ich suche bei anderen Menschen nach Mitgefühl, wenn ich unglücklich bin.                                                                            | ①                              | ②                            | ③                               | ④                           | ⑤                             |
| 5.  | Die Ideen einer anderen Person zu hören, wie man die Situation handhaben kann, hilft mir, wenn ich mir Sorgen mache.                                | ①                              | ②                            | ③                               | ④                           | ⑤                             |
| 6.  | Die Anwesenheit bestimmter Menschen fühlt sich gut an, wenn ich voller Freude bin.                                                                  | ①                              | ②                            | ③                               | ④                           | ⑤                             |
| 7.  | Mich von Leuten daran erinnern zu lassen, dass andere schlechter dran sind, hilft mir, wenn ich aufgebracht bin.                                    | ①                              | ②                            | ③                               | ④                           | ⑤                             |
| 8.  | Ich bin gerne in Gesellschaft, wenn es mir gut geht, weil dies meine positiven Gefühle verstärkt.                                                   | ①                              | ②                            | ③                               | ④                           | ⑤                             |
| 9.  | Wenn ich aufgebracht bin, hilft es mir, wenn andere mir deutlich machen, dass die Situation viel schlimmer sein könnte.                             | ①                              | ②                            | ③                               | ④                           | ⑤                             |
| 10. | Wenn ich mich über etwas ärgere, können andere mich beruhigen, indem sie mir sagen, dass ich mir keine Gedanken machen muss.                        | ①                              | ②                            | ③                               | ④                           | ⑤                             |
| 11. | Wenn ich frustriert bin, hilft es mir zu verstehen, wie andere mit der gleichen Situation umgehen würden.                                           | ①                              | ②                            | ③                               | ④                           | ⑤                             |
| 12. | Ich suche die Zuwendung anderer, wenn ich mich aufgewühlt fühle.                                                                                    | ①                              | ②                            | ③                               | ④                           | ⑤                             |
| 13. | Weil gute Laune ansteckend ist, suche ich andere Leute auf, wenn ich fröhlich bin.                                                                  | ①                              | ②                            | ③                               | ④                           | ⑤                             |
| 14. | Wenn ich aufgebracht bin, suche ich oft Leute auf, die Verständnis für meine Situation ausdrücken.                                                  | ①                              | ②                            | ③                               | ④                           | ⑤                             |
| 15. | Wenn ich traurig bin, hilft es mir zu hören, wie andere mit ähnlichen Gefühlen umgegangen sind.                                                     | ①                              | ②                            | ③                               | ④                           | ⑤                             |
| 16. | Wenn ich mich niedergeschlagen fühle, wende ich mich an andere Leute, einfach um zu wissen, dass sie für mich da sind.                              | ①                              | ②                            | ③                               | ④                           | ⑤                             |
| 17. | Wenn ich ängstlich bin, kann es mich beruhigen, wenn Leute mir sagen, dass ich mir keine Sorgen machen muss.                                        | ①                              | ②                            | ③                               | ④                           | ⑤                             |
| 18. | Wenn ich voller Freude bin, suche ich andere Menschen auf, um sie glücklich zu machen.                                                              | ①                              | ②                            | ③                               | ④                           | ⑤                             |
| 19. | Wenn ich traurig bin, suche ich Trost bei anderen.                                                                                                  | ①                              | ②                            | ③                               | ④                           | ⑤                             |
| 20. | Wenn ich durcheinander bin, hilft es mir zu wissen, was andere Leute in meiner Situation tun würden.                                                | ①                              | ②                            | ③                               | ④                           | ⑤                             |
