# Supplementary material for: Psychometrische Eigenschaften der deutschsprachigen Version des Interpersonal Emotion Regulation Questionnaire
Source: Atypon-hosted journal article supplement (doi:10.1026/0012-1924/a000239), 2019-12-19
Supplement: 0012-1924_a000239_esm2.pdf [file 0012-1924_a000239_esm2.pdf]

*Elektronisches Supplement 2.* Faktorladungen des deutschsprachigen Interpersonal Emotion Regulation Questionnaire (IERQ) für Stichprobe 2 geordnet nach Faktoren und Höhe der Ladungen.

| Nr. | Items                                                                                                                                               | Faktoren   |            |            |            | h <sup>2</sup> |
|-----|-----------------------------------------------------------------------------------------------------------------------------------------------------|------------|------------|------------|------------|----------------|
|     |                                                                                                                                                     | 1          | 2          | 3          | 4          |                |
| 13  | Weil gute Laune ansteckend ist, suche ich andere Leute auf, wenn ich fröhlich bin.                                                                  | <b>.87</b> | .03        | -.02       | -.03       | .73            |
| 18  | Wenn ich voller Freude bin, suche ich andere Menschen auf, um sie glücklich zu machen.                                                              | <b>.85</b> | .02        | -.07       | -.01       | .69            |
| 8   | Ich bin gerne in Gesellschaft wenn es mir gut geht, weil dies meine positiven Gefühle verstärkt.                                                    | <b>.85</b> | .05        | -.07       | .03        | .72            |
| 3   | Ich bin gerne von anderen umgeben, wenn ich begeistert bin, um meine Gefühle zu teilen.                                                             | <b>.77</b> | -.00       | .15        | -.06       | .68            |
| 6   | Die Anwesenheit bestimmter Menschen fühlt sich gut an, wenn ich voller Freude bin.                                                                  | <b>.71</b> | -.11       | .06        | .07        | .55            |
| 7   | Mich von Leuten daran erinnern zu lassen, dass andere schlechter dran sind, hilft mir wenn ich aufgebracht bin.                                     | -.02       | <b>.85</b> | -.05       | -.09       | .60            |
| 10  | Wenn ich aufgebracht bin, hilft es mir, wenn andere mir deutlich machen, dass die Situation viel schlimmer sein könnte.                             | .01        | <b>.81</b> | -.04       | -.01       | .63            |
| 14  | Wenn ich mich über etwas ärgere können andere mich beruhigen, indem sie mir sagen, dass ich mir keine Gedanken machen muss.                         | -.02       | <b>.72</b> | .03        | .04        | .57            |
| 2   | Es hilft mir, mit niedergeschlagener Stimmung umzugehen, wenn andere mich darauf hinweisen, dass die Dinge nicht so schlimm sind, wie sie scheinen. | .07        | <b>.70</b> | -.02       | .12        | .62            |
| 17  | Wenn ich ängstlich bin, kann es mich beruhigen, wenn Leute mir sagen, dass ich mir keine Sorgen machen muss.                                        | -.04       | <b>.63</b> | .12        | .03        | .48            |
| 4   | Ich suche bei anderen Menschen nach Mitgefühl, wenn ich unglücklich bin.                                                                            | -.07       | .03        | <b>.87</b> | -.04       | .69            |
| 19  | Wenn ich traurig bin, suche ich Trost bei anderen.                                                                                                  | -.02       | .04        | <b>.86</b> | -.01       | .75            |
| 16  | Wenn ich mich niedergeschlagen fühle, wende ich mich an andere Leute, einfach um zu wissen, dass sie für mich da sind.                              | -.00       | .01        | <b>.83</b> | -.01       | .69            |
| 12  | Ich suche die Zuwendung anderer, wenn ich mich aufgewühlt fühle.                                                                                    | .07        | .02        | <b>.82</b> | -.02       | .74            |
| 9   | Wenn ich mich aufgebracht fühle, suche ich oft Leute auf, die Verständnis für mich ausdrücken.                                                      | .07        | -.10       | <b>.72</b> | .11        | .61            |
| 5   | Die Ideen einer anderen Person zu hören, wie man die Situation handhaben kann, hilft mir wenn ich mir Sorgen mache.                                 | .06        | -.07       | -.07       | <b>.90</b> | .74            |
| 11  | Wenn ich frustriert bin, hilft es mir zu verstehen, wie andere mit der gleichen Situation umgehen würden.                                           | -.04       | .02        | -.02       | <b>.88</b> | .75            |
| 20  | Wenn ich durcheinander bin, hilft es mir zu wissen, was andere Leute in meiner Situation tun würden.                                                | -.01       | -.01       | .04        | <b>.83</b> | .71            |
| 15  | Wenn ich traurig bin, hilft es mir zu hören, wie andere mit ähnlichen Gefühlen umgegangen sind.                                                     | -.06       | .06        | .08        | <b>.82</b> | .77            |
| 1   | Ich fühle mich besser, wenn ich erfahre, wie andere mit ihren Gefühlen umgegangen sind.                                                             | .04        | .05        | .00        | <b>.80</b> | .71            |

*Anmerkungen:* Fett gedruckt werden jeweils maximale Faktorladungen markiert. Die Reihenfolge der Faktoren wurde entsprechend der englischen Originalversion festgelegt. Faktor 1 = Steigerung positiven Affekts; Faktor 2 = Perspektive übernehmen; Faktor 3 = Beruhigen und Trösten; Faktor 4 = Andere als Modell; h<sup>2</sup> = Kommunalitäten.
