# Supplementary material for: Psychometrische Eigenschaften der deutschsprachigen Version des Interpersonal Emotion Regulation Questionnaire
Source: Atypon-hosted journal article supplement (doi:10.1026/0012-1924/a000239), 2019-12-19
Supplement: 0012-1924_a000239_esm3.pdf [file 0012-1924_a000239_esm3.pdf]

Elektronisches Supplement 3. Konfirmatorische Faktorenanalyse der deutschen Übersetzung des Interpersonal Emotion Regulation Questionnaire (IERQ).

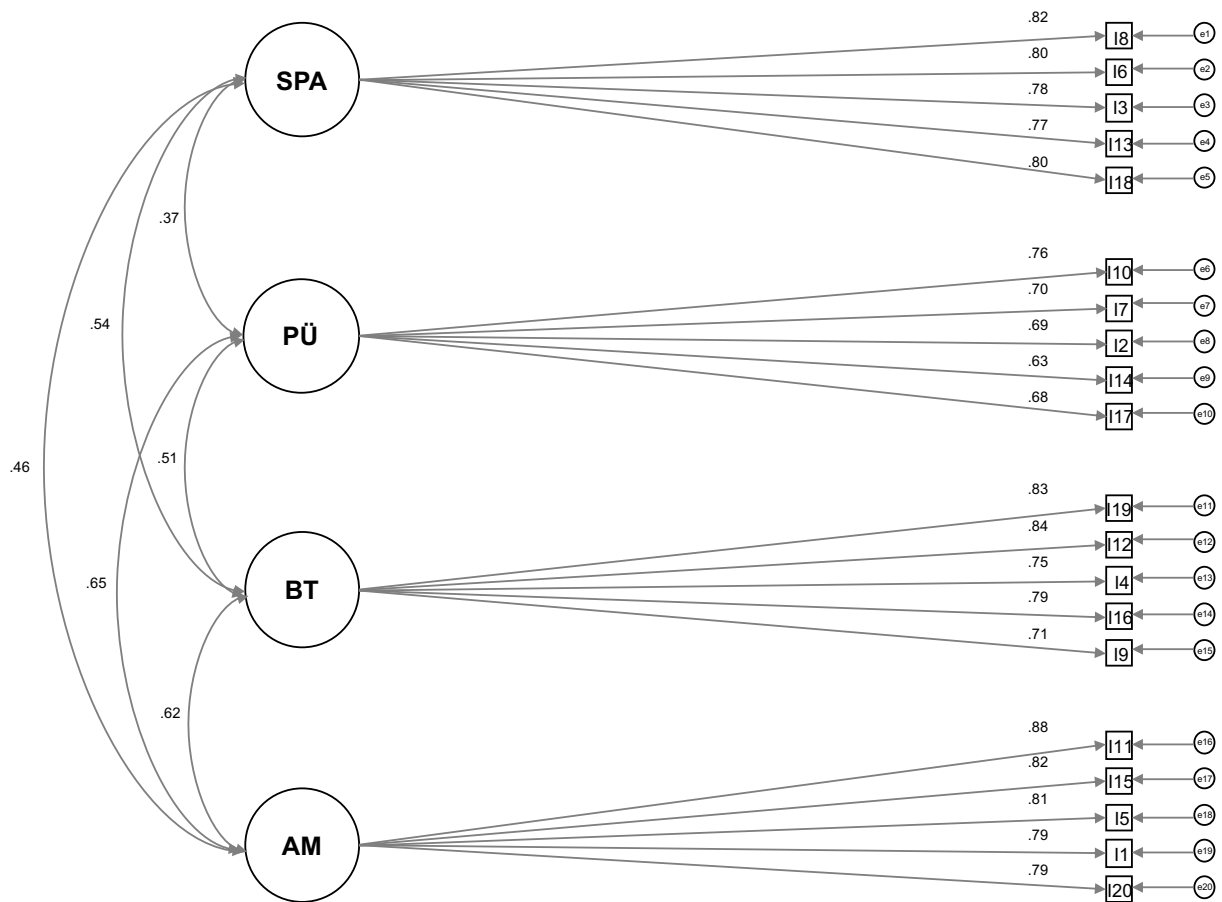

Anmerkungen: Die Reihenfolge der Faktoren wurde entsprechend der englischen Originalversion festgelegt. Faktor 1 (SPA) = Steigerung positiven Affekts; Faktor 2 (PÜ) = Perspektive übernehmen; Faktor 3 (BT) = Beruhigen und Trösten; Faktor 4 (AM) = Andere als Modell.
