# Supplementary material for: Psychometrische Eigenschaften der deutschsprachigen Version des Interpersonal Emotion Regulation Questionnaire
Source: Atypon-hosted journal article supplement (doi:10.1026/0012-1924/a000239), 2019-12-19
Supplement: 0012-1924_a000239_esm4.pdf [file 0012-1924_a000239_esm4.pdf]

*Elektronisches Supplement 4.* Mittelwerte (*M*) und Standardabweichungen (*SD*) sowie part-whole korrigierte Itemtrennschärfen<sup>a</sup> ( $r_{it}$ ) und Retest-Reliabilitäten ( $r_{tt}$ ) der 20 Items der deutschsprachigen Version des Interpersonal Emotion Regulation Questionnaire (IERQ).

| Item-Nr. <sup>b</sup> | Stichprobe 1 |           |          |          | Stichprobe 2 |           |          |
|-----------------------|--------------|-----------|----------|----------|--------------|-----------|----------|
|                       | <i>M</i>     | <i>SD</i> | $r_{it}$ | $r_{tt}$ | <i>M</i>     | <i>SD</i> | $r_{it}$ |
| 1                     | 2.97         | 1.16      | .59      | .34      | 3.20         | 1.17      | .76      |
| 2                     | 2.71         | 1.23      | .64      | .57      | 2.82         | 1.23      | .65      |
| 3                     | 4.23         | .87       | .62      | .8       | 3.80         | 1.14      | .71      |
| 4                     | 2.75         | 1.20      | .69      | .68      | 3.04         | 1.25      | .71      |
| 5                     | 3.32         | 1.21      | .74      | .70      | 3.45         | 1.11      | .75      |
| 6                     | 4.24         | 0.87      | .62      | .60      | 4.32         | 0.92      | .61      |
| 7                     | 2.45         | 1.24      | .56      | .09      | 2.14         | 1.11      | .57      |
| 8                     | 4.08         | 0.93      | .69      | .32      | 3.89         | 1.10      | .74      |
| 9                     | 2.49         | 1.18      | .60      | .46      | 3.48         | 1.21      | .66      |
| 10                    | 2.37         | 1.14      | .68      | .61      | 2.50         | 1.18      | .62      |
| 11                    | 3.06         | 1.15      | .81      | .73      | 3.26         | 1.17      | .78      |
| 12                    | 2.92         | 1.19      | .73      | .70      | 3.22         | 1.21      | .77      |
| 13                    | 3.70         | 1.12      | .68      | .65      | 3.49         | 1.16      | .75      |
| 14                    | 2.44         | 1.20      | .57      | .80      | 2.63         | 1.18      | .62      |
| 15                    | 3.00         | 1.25      | .78      | .57      | 3.22         | 1.21      | .80      |
| 16                    | 2.35         | 1.32      | .68      | .56      | 3.15         | 1.25      | .72      |
| 17                    | 2.70         | 1.27      | .59      | .55      | 2.97         | 1.21      | .55      |
| 18                    | 3.50         | 1.12      | .52      | .72      | 3.49         | 1.19      | .71      |
| 19                    | 2.84         | 1.30      | .73      | .75      | 3.11         | 1.22      | .77      |
| 20                    | 2.90         | 1.23      | .71      | .43      | 3.38         | 1.15      | .75      |

*Anmerkungen:* <sup>a</sup> Part-whole korrigierte Trennschärfen wurden in Bezug zur jeweiligen Subskala berechnet. <sup>b</sup> Item-Nummern entsprechend Abfolge im Fragebogen.
