# Supplementary material for: Psychometrische Eigenschaften der deutschsprachigen Version des Interpersonal Emotion Regulation Questionnaire
Source: Atypon-hosted journal article supplement (doi:10.1026/0012-1924/a000239), 2019-12-19
Supplement: 0012-1924_a000239_esm5.pdf [file 0012-1924_a000239_esm5.pdf]

*Elektronisches Supplement 5. Kennwerte der vier Subskalen des deutschsprachigen Interpersonal Emotion Regulation Questionnaire (IERQ).*

| IERQ-Subskalen                | <i>M</i> | <i>SD</i> | Sch  | Ex   | $\alpha$ | $r_{tt}$ | IERQ-Subskalen |     |     |     |
|-------------------------------|----------|-----------|------|------|----------|----------|----------------|-----|-----|-----|
|                               |          |           |      |      |          |          | SPA            | PÜ  | BT  | AM  |
| Stichprobe 1                  |          |           |      |      |          |          |                |     |     |     |
| Steigerung pos. Affekts (SPA) | 19.75    | 3.77      | -.60 | -.02 | .82      | .73      |                | .33 | .36 | .32 |
| Perspektive übernehmen (PÜ)   | 12.67    | 4.61      | .26  | -.53 | .82      | .74      |                |     | .49 | .53 |
| Beruhigen und Trösten (BT)    | 13.35    | 4.98      | .38  | -.65 | .87      | .72      |                |     |     | .55 |
| Andere als Modell (AM)        | 15.25    | 5.25      | -.16 | -.61 | .89      | .72      |                |     |     |     |
| Stichprobe 2                  |          |           |      |      |          |          |                |     |     |     |
| Steigerung pos. Affekts (SPA) | 18.98    | 4.52      | -.79 | .23  | .88      |          |                | .30 | .49 | .41 |
| Perspektive übernehmen (PÜ)   | 13.06    | 4.47      | .19  | -.52 | .81      |          |                |     | .43 | .56 |
| Beruhigen und Trösten (BT)    | 15.99    | 5.09      | -.24 | -.70 | .89      |          |                |     |     | .56 |
| Andere als Modell (AM)        | 16.52    | 4.96      | -.33 | -.54 | .91      |          |                |     |     |     |

*Anmerkungen:* *M* = Mittelwert; *SD* = Standardabweichung; Sch = Schiefe; Ex = Exzess;  $\alpha$  = Cronbachs  $\alpha$ ;  $r_{tt}$  = Retest-Reliabilitätskoeffizient.
